# Supplementary material for: Altered Microbiomes in Bovine Digital Dermatitis Lesions, and the Gut as a Pathogen Reservoir
Source: PubMed Central journal article supplement (PMC4362943; doi:10.1371/journal.pone.0120504), 2015-03-17
Supplement: pone.0120504.s009.pdf [file pone.0120504.s009.pdf]

| Canonical 1                              |       | Canonical 2                               |       | Canonical 2                               |       |
|------------------------------------------|-------|-------------------------------------------|-------|-------------------------------------------|-------|
| Bacterial species                        | Score | Bacterial species                         | Score | Bacterial species                         | Score |
| <i>Treponema paraluis-cuniculi</i>       | 0.95  | <i>Porphyromonas asaccharolytica</i>      | 1.32  | <i>Candidatus Phytoplasma brasiliense</i> | 0.65  |
| <i>Anaerococcus prevotii</i>             | 0.94  | <i>Arcobacter marinus</i>                 | 0.92  | <i>Finegoldia magna</i>                   | 0.60  |
| <i>Candidatus Phytoplasma prunorum</i>   | 0.89  | <i>Candidatus Phytoplasma brasiliense</i> | 0.48  | <i>Meiothermus granaticius</i>            | 0.58  |
| <i>Clostridium thermoalcaliphilum</i>    | 0.78  | <i>Hydrocarboniphaga daqingensis</i>      | 0.48  | <i>Helcococcus sueciensis</i>             | 0.49  |
| <i>Treponema denticola</i>               | 0.59  | <i>Alkaliphilus crotonatoxidans</i>       | 0.45  | <i>Peptostreptococcus anaerobius</i>      | 0.37  |
| <i>Candidatus Amoebophilus asiaticus</i> | 0.57  | <i>Oligella ureolytica</i>                | 0.35  | <i>Prevotella dentasini</i>               | 0.36  |
| <i>Telmatospirillum siberiense</i>       | 0.55  | <i>Anaerococcus prevotii</i>              | 0.33  | <i>Gemella cunicula</i>                   | 0.29  |
| <i>Treponema phagedenis</i>              | 0.54  | <i>Tepidimicrobium ferriphilum</i>        | 0.30  | <i>Treponema paraluis-cuniculi</i>        | 0.27  |
| <i>Acholeplasma palmae</i>               | 0.53  | <i>Acholeplasma palmae</i>                | 0.28  | <i>Tepidimicrobium ferriphilum</i>        | 0.25  |
| <i>Soehngenia saccharolytica</i>         | 0.46  | <i>Mogibacterium timidum</i>              | 0.24  | <i>Anaerococcus prevotii</i>              | 0.24  |
| <i>Arcobacter marinus</i>                | 0.45  | <i>Catonella morbi</i>                    | 0.22  | <i>Selenomonas artemidis</i>              | 0.22  |
| <i>Alkaliphilus crotonatoxidans</i>      | 0.45  | <i>Treponema phagedenis</i>               | 0.20  | <i>Soehngenia saccharolytica</i>          | 0.21  |
| <i>Corynebacterium propinquum</i>        | 0.41  | <i>Treponema paraluis-cuniculi</i>        | 0.19  | <i>Campylobacter ureolyticus</i>          | 0.21  |
| <i>Johnsonella ignava</i>                | 0.39  | <i>Bacteroides rodentium</i>              | 0.18  | <i>Escherichia coli</i>                   | 0.20  |
| <i>Porphyromonas cansulci</i>            | 0.38  | <i>Treponema putidum</i>                  | 0.17  | <i>Treponema maltophilum</i>              | 0.16  |
| <i>Treponema medium</i>                  | 0.37  | <i>Brochothrix thermosphacta</i>          | 0.17  | <i>Mobiluncus mulieris</i>                | 0.14  |
| <i>Psychroflexus gondwanensis</i>        | 0.36  | <i>Mycoplasma fermentans</i>              | 0.11  | <i>Bacteroides rodentium</i>              | 0.11  |
| <i>Treponema putidum</i>                 | 0.35  | <i>Candidatus Phytoplasma phoenicium</i>  | 0.10  | <i>Treponema putidum</i>                  | 0.10  |
| <i>Succiniclasticum ruminis</i>          | 0.34  | <i>Pseudomonas azotoformans</i>           | 0.10  | <i>Oligella ureolytica</i>                | 0.09  |
| <i>Mycoplasma fermentans</i>             | 0.34  | <i>Treponema maltophilum</i>              | 0.09  | <i>Candidatus Phytoplasma phoenicium</i>  | 0.08  |
| <i>Bacteroides graminisolvans</i>        | 0.34  | <i>Johnsonella ignava</i>                 | 0.08  | <i>Treponema phagedenis</i>               | 0.08  |
| <i>Oligella ureolytica</i>               | 0.32  | <i>Treponema medium</i>                   | 0.08  | <i>Hydrocarboniphaga daqingensis</i>      | 0.05  |
| <i>Treponema maltophilum</i>             | 0.28  | <i>Campylobacter gracilis</i>             | 0.08  | <i>Clostridium thermoalcaliphilum</i>     | 0.05  |
| <i>Treponema calligyrum</i>              | 0.26  | <i>Soehngenia saccharolytica</i>          | 0.06  | <i>Propionispora hippei</i>               | 0.02  |
| <i>Porphyromonas asaccharolytica</i>     | 0.24  | <i>Escherichia coli</i>                   | 0.05  | <i>Treponema denticola</i>                | 0.02  |
| <i>Mogibacterium timidum</i>             | 0.23  | <i>Anaerococcus tetradius</i>             | 0.04  | <i>Corynebacterium propinquum</i>         | 0.01  |
| <i>Campylobacter curvus</i>              | 0.23  | <i>Saccharothrix yanglingensis</i>        | 0.04  | <i>Porphyromonas asaccharolytica</i>      | 0.01  |
| <i>Candidatus Phytoplasma</i>            | 0.21  | <i>Mobiluncus mulieris</i>                | 0.01  | <i>Brochothrix</i>                        | 0.00  |

| <i>fragariae</i>                          |       |                                          |       | <i>thermosphacta</i>                      |       |
|-------------------------------------------|-------|------------------------------------------|-------|-------------------------------------------|-------|
| <i>Tepidimicrobium ferriphilum</i>        | 0.20  | <i>Propionispora hippei</i>              | -0.01 | <i>Porphyromonas cansulci</i>             | -0.04 |
| <i>Pelotomaculum isophthalicum</i>        | 0.19  | <i>Telmatospirillum siberiense</i>       | -0.03 | <i>Candidatus Phytoplasma fragariae</i>   | -0.05 |
| <i>Selenomonas artemidis</i>              | 0.18  | <i>Prevotella dantasini</i>              | -0.04 | <i>Mycoplasma fermentans</i>              | -0.05 |
| <i>Propionispora hippei</i>               | 0.18  | <i>Campylobacter curvus</i>              | -0.06 | <i>Saccharothrix yanglingensis</i>        | -0.05 |
| <i>Sedimentibacter hydroxybenzoicus</i>   | 0.16  | <i>Treponema denticola</i>               | -0.06 | <i>Anaerovibrio lipolyticus</i>           | -0.08 |
| <i>Meiothermus granaticius</i>            | 0.14  | <i>Anaerovibrio lipolyticus</i>          | -0.07 | <i>Acholeplasma palmae</i>                | -0.09 |
| <i>Campylobacter gracilis</i>             | 0.12  | <i>Psychroflexus gondwanensis</i>        | -0.07 | <i>Psychroflexus gondwanensis</i>         | -0.10 |
| <i>Mobiluncus mulieris</i>                | 0.10  | <i>Selenomonas artemidis</i>             | -0.11 | <i>Treponema calligyrum</i>               | -0.10 |
| <i>Escherichia coli</i>                   | 0.10  | <i>Sedimentibacter hydroxybenzoicus</i>  | -0.12 | <i>Catonella morbi</i>                    | -0.10 |
| <i>Anaerococcus tetradius</i>             | 0.09  | <i>Desulfovibrio simplex</i>             | -0.17 | <i>Mogibacterium timidum</i>              | -0.12 |
| <i>Campylobacter ureolyticus</i>          | 0.08  | <i>Bacteroides graminisolvens</i>        | -0.17 | <i>Telmatospirillum siberiense</i>        | -0.12 |
| <i>Anaerovibrio lipolyticus</i>           | 0.08  | <i>Clostridium thermoalcaliphilum</i>    | -0.20 | <i>Campylobacter gracilis</i>             | -0.14 |
| <i>Desulfovibrio simplex</i>              | 0.04  | <i>Succiniclasticum ruminis</i>          | -0.20 | <i>Treponema medium</i>                   | -0.16 |
| <i>Peptostreptococcus anaerobius</i>      | 0.04  | <i>Candidatus Phytoplasma fragariae</i>  | -0.22 | <i>Pseudomonas azotoformans</i>           | -0.17 |
| <i>Catonella morbi</i>                    | -0.01 | <i>Corynebacterium propinquum</i>        | -0.22 | <i>Desulfovibrio simplex</i>              | -0.17 |
| <i>Bacteroides rodentium</i>              | -0.04 | <i>Pelotomaculum isophthalicum</i>       | -0.23 | <i>Bacteroides graminisolvens</i>         | -0.21 |
| <i>Saccharothrix yanglingensis</i>        | -0.08 | <i>Candidatus Amoebophilus asiaticus</i> | -0.24 | <i>Candidatus Amoebophilus asiaticus</i>  | -0.25 |
| <i>Prevotella dantasini</i>               | -0.23 | <i>Treponema calligyrum</i>              | -0.29 | <i>Pelotomaculum isophthalicum</i>        | -0.25 |
| <i>Pseudomonas azotoformans</i>           | -0.26 | <i>Campylobacter ureolyticus</i>         | -0.33 | <i>Alkaliphilus crotonatoxidans</i>       | -0.27 |
| <i>Finegoldia magna</i>                   | -0.30 | <i>Porphyromonas cansulci</i>            | -0.45 | <i>Candidatus Phytoplasma prunorum</i>    | -0.28 |
| <i>Hydrocarboniphaga daqingensis</i>      | -0.30 | <i>Helcococcus sueciensis</i>            | -0.46 | <i>Johnsonella ignava</i>                 | -0.29 |
| <i>Candidatus Phytoplasma phoenicium</i>  | -0.31 | <i>Candidatus Phytoplasma prunorum</i>   | -0.60 | <i>Sedimentibacter hydroxybenzoicus</i>   | -0.31 |
| <i>Brochothrix thermosphacta</i>          | -0.37 | <i>Finegoldia magna</i>                  | -0.81 | <i>Campylobacter curvus</i>               | -0.35 |
| <i>Helcococcus sueciensis</i>             | -0.38 | <i>Gemella cunicula</i>                  | -0.82 | <i>Succiniclasticum ruminis</i>           | -0.40 |
| <i>Gemella cunicula</i>                   | -0.42 | <i>Peptostreptococcus anaerobius</i>     | -0.82 | <i>Arcobacter marinus</i>                 | -0.66 |
| <i>Candidatus Phytoplasma brasiliense</i> | -0.84 | <i>Meiothermus granaticius</i>           | -1.88 | <i>Anaerococcus tetradius</i>             | -0.90 |
| <i>Treponema paraluis-cuniculi</i>        | 0.95  | <i>Porphyromonas asaccharolytica</i>     | 1.32  | <i>Candidatus Phytoplasma brasiliense</i> | 0.65  |
